# Supplementary material for: Innovative low-cost engineered adsorbents based on eggshell waste for nickel removal from aqueous solutions
Source: Research Square preprint supplement (doi:10.21203/rs.3.rs-2613416/v3), 2023-07-20
Supplement: Supplementary file 1 [file 842e7fdab34fe03e48384ce2.doc]

**SUPPLEMENTARY INOFORMATION**

**Innovative low-cost engineered adsorbents based on waste eggshell for nickel removal from aqueous solutions**

Adina-Elena SEGNEANU**1**, Roxana TRUSCA**2**, Claudiu CEPAN**3**,Maria MIHAILESCU**3,4**,

Cornelia MUNTEAN**3,4** and Ioan GROZESCU**3**

**1** Institute for Advanced Environmental Research-West University of Timisoara (ICAM-WUT)Oituz nr.4, Timișoara

**2**National Center for Micro and Nanomaterials, Politehnica University of Bucharest

**3** University Politehnica Timisoara*,* 2 P-ta Victoriei*,* 300006, Timisoara, Romania

**4** Research Institute for Renewable Energy, 138 Gavril Musicescu Str, 300501, Timisoara, Romania

FIGURES

Figure 1S: FT- IR spectra of zeolite (A), eggshell (B), EZ (C), and FEZ (D)

Figure 2S: EDX spectra of zeolite (A), and eggshell (B),

Figure 3S: SEM Live map (1) and EDX spectra showing the distribution of elements (2) in EZ (A), and FEZ (B)

Figure 4S: XRD patterns of zeolite (A), eggshell (B), EZ (C), and ZEF (D)

Figure 5S: FT-IR spectra of EZ (A) after adsorption, and (B) before and after adsorption

Figure 6S: FT-IR spectra of FEZ (A) after adsorption, and (B) before and after adsorption

Figure 7S: SEM micrographs of EZ (A, 30 μm; C, 50 μm) before adsorption, and (B, 30 μm; D, 50 μm) after adsorption

Figure 8S: SEM micrographs of FEZ (A, 30 μm; C, 50 μm) before adsorption, and (B, 30 μm; D-E, 50 μm) after adsorption

Figure 9S: SEM Live maps of EZ (A) and FEZ (B) after adsorption

Figure 10S: EDX spectrum of EZ (A) and FEZ (B) after adsorption

| **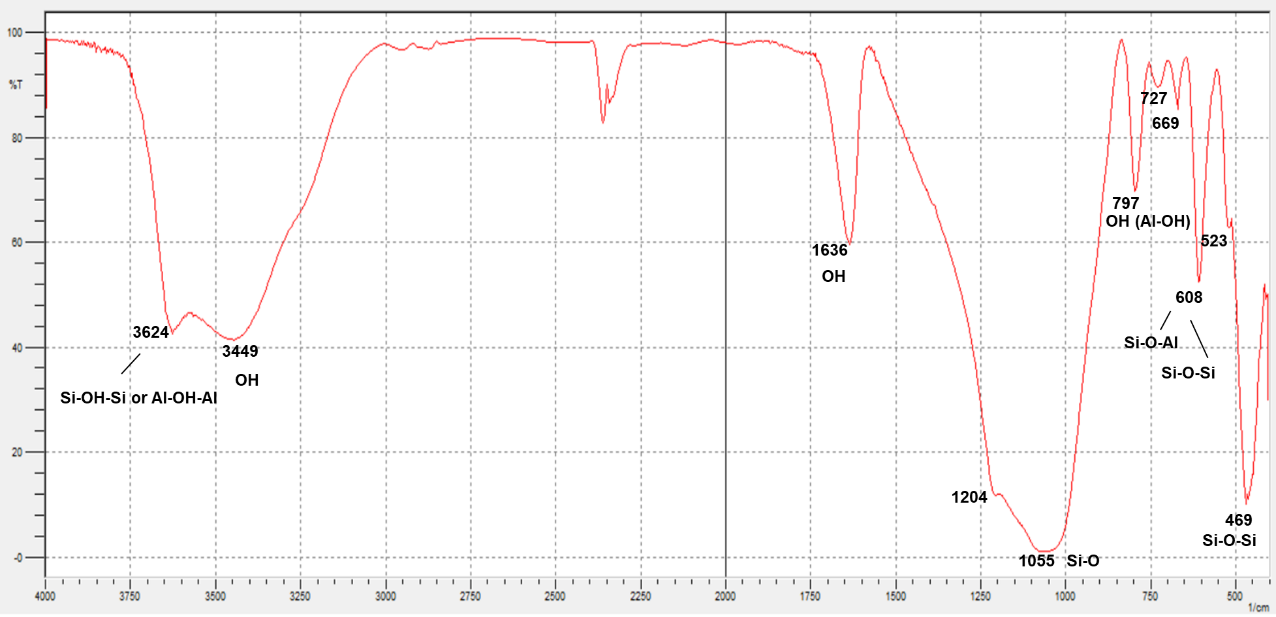** |
| --- |
| **Figure 1SA** |

| **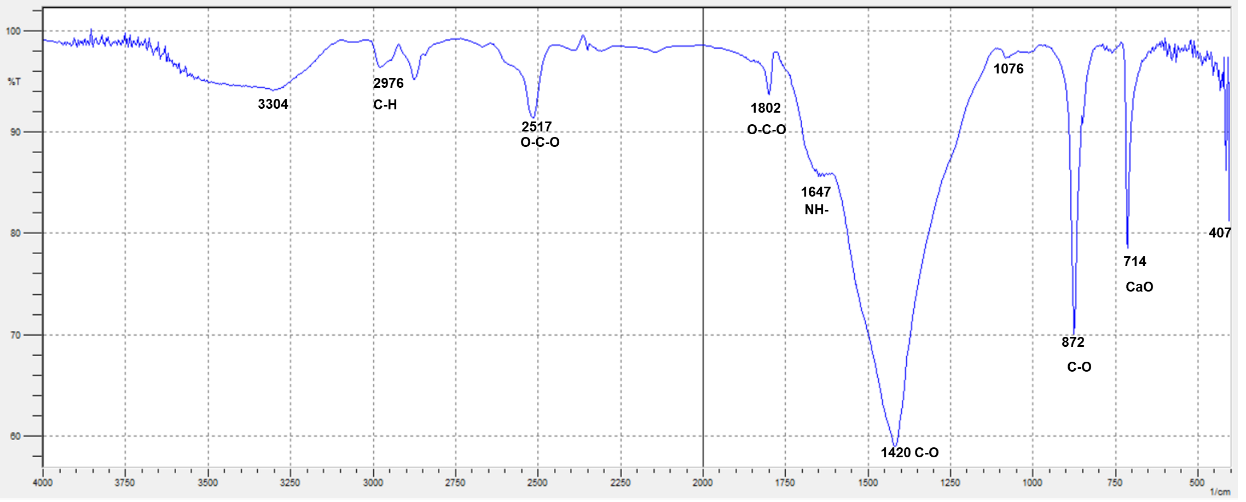** |
| --- |
| **Figure 1SB** |

| **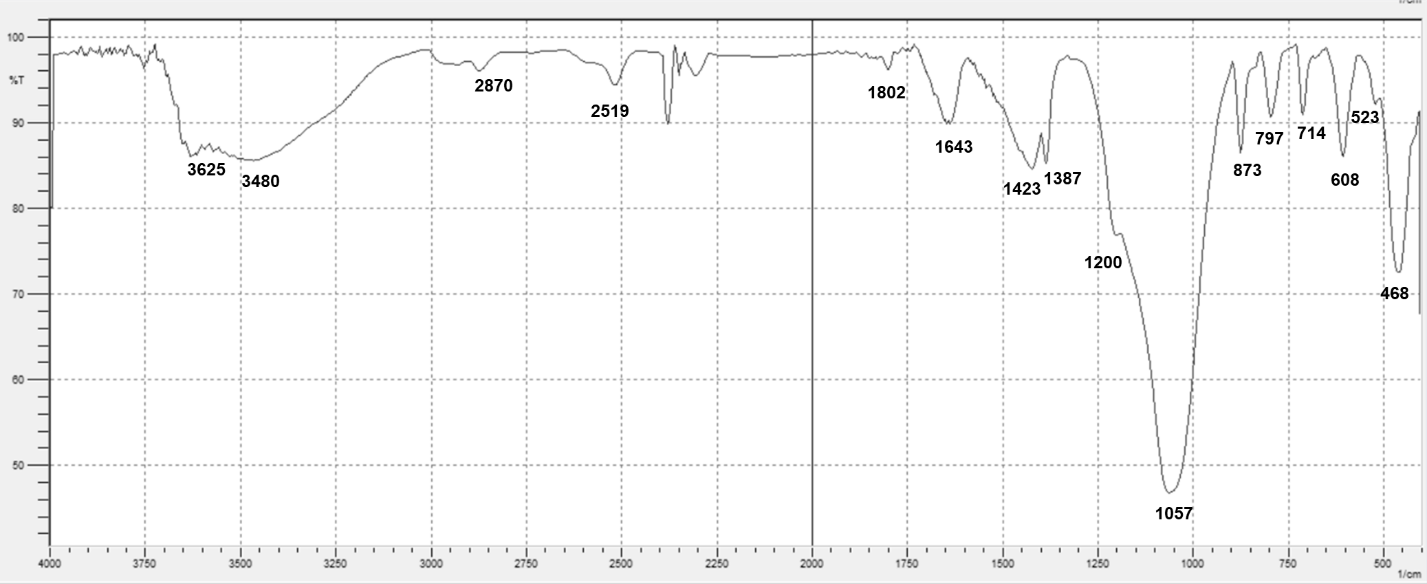** |
| --- |
| **Figure 1SC** |
|  |
|  |

| 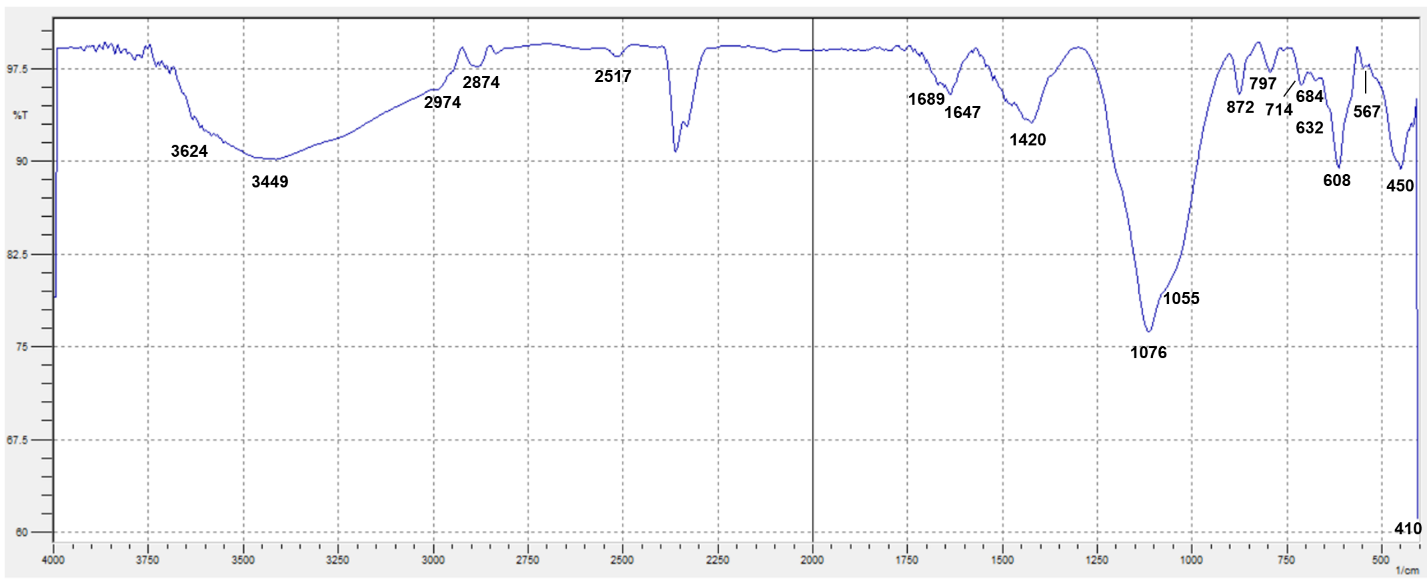 |
| --- |

**Figure 1SD**


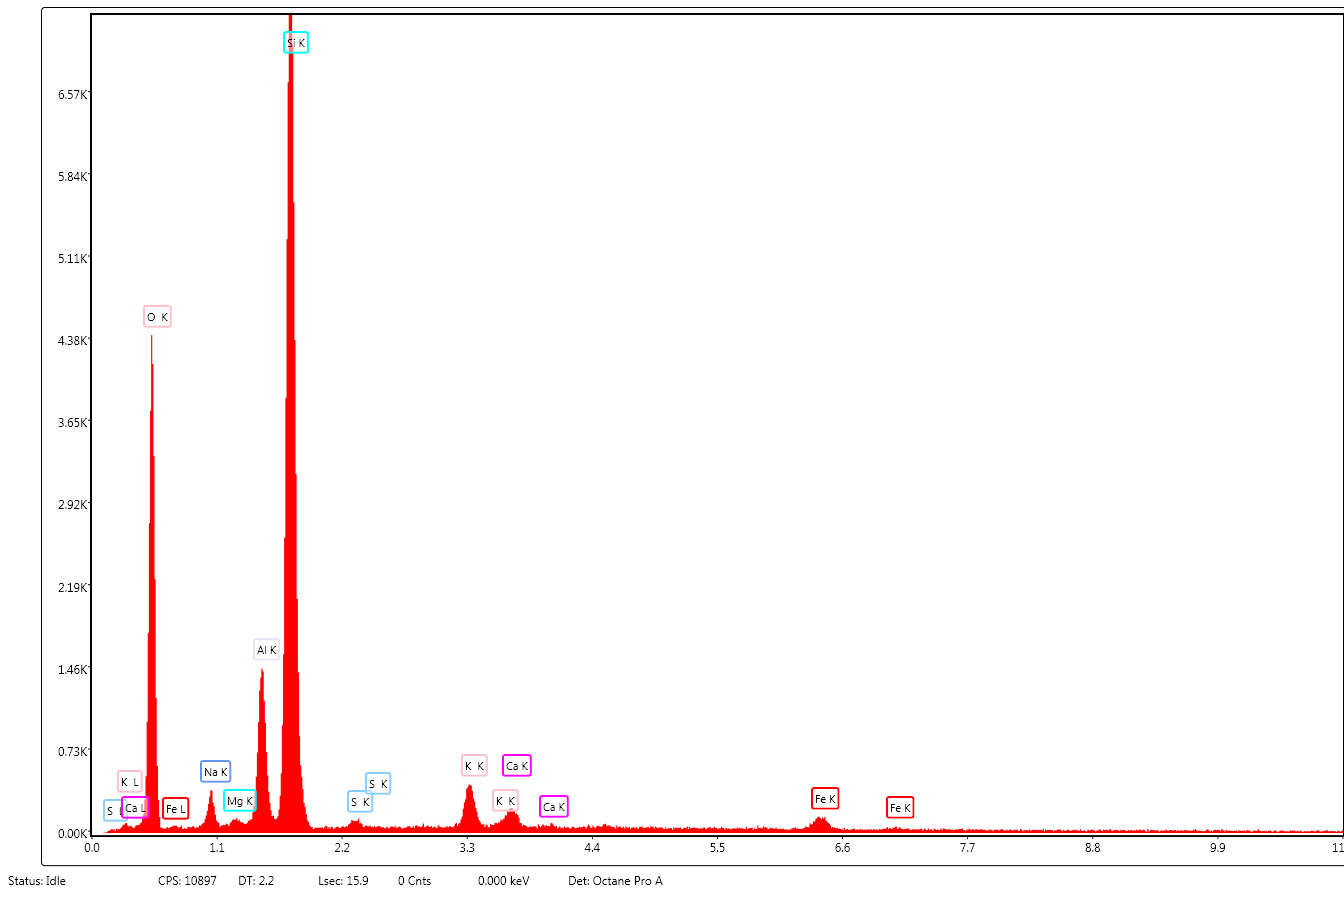


Figure 2SA

| 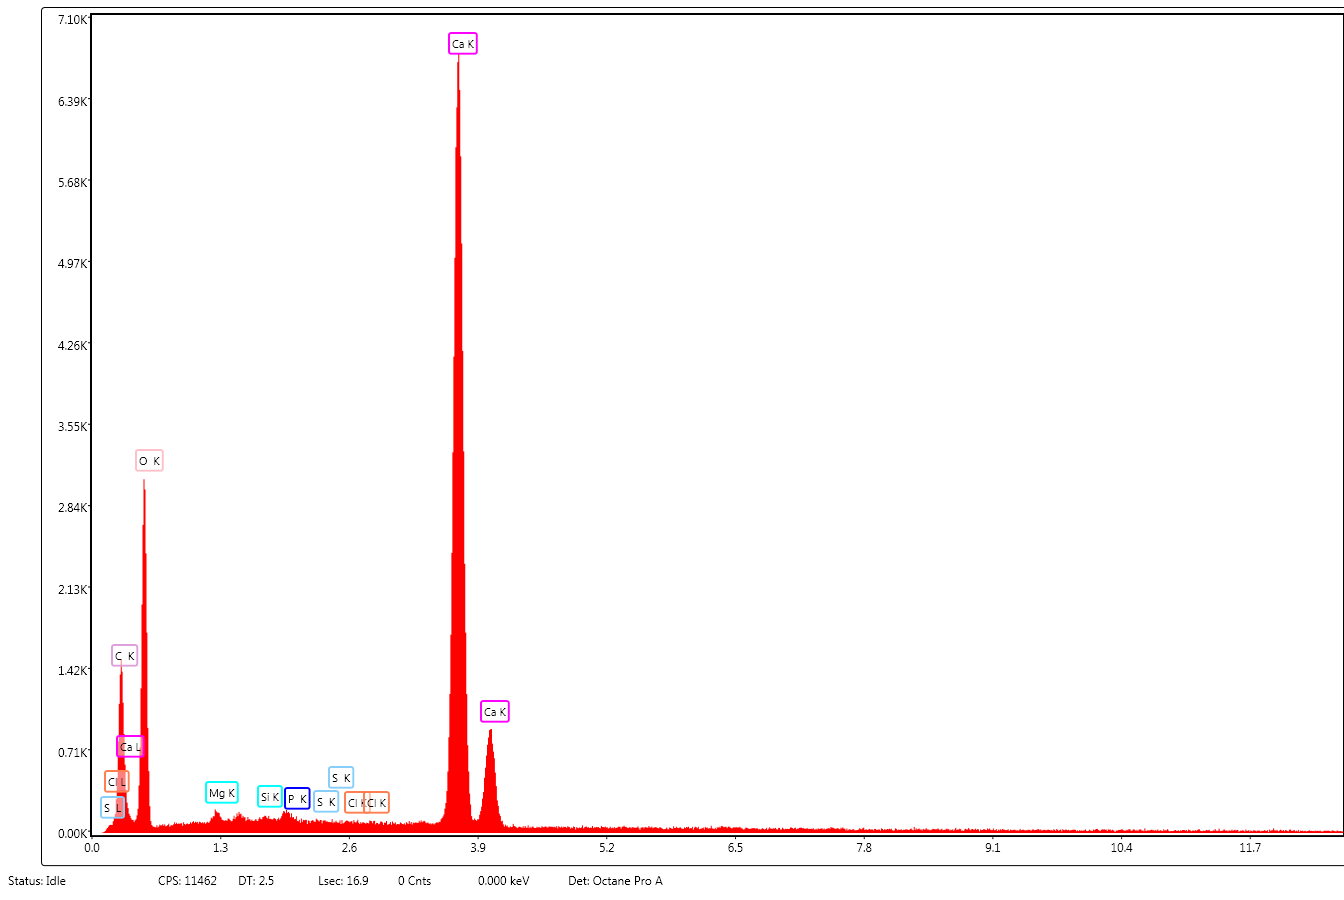 |
| --- |
| Figure 2SB |

| **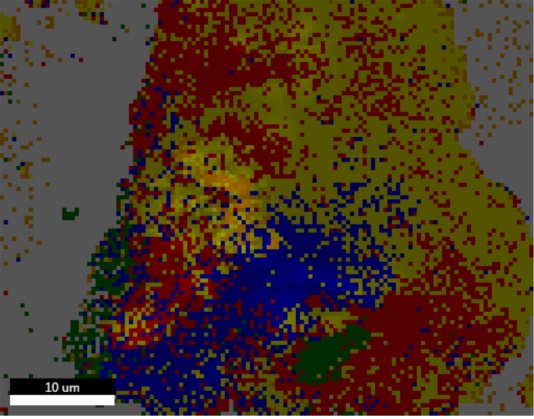** | **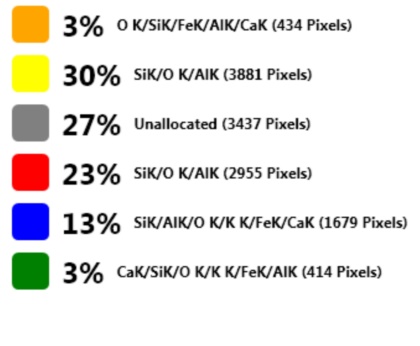** | **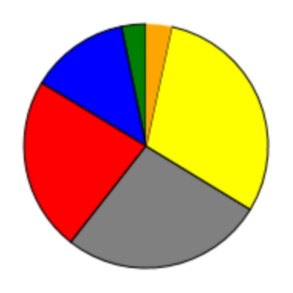** |
| --- | --- | --- |
| **Figure 3SA(1)** | | |

| **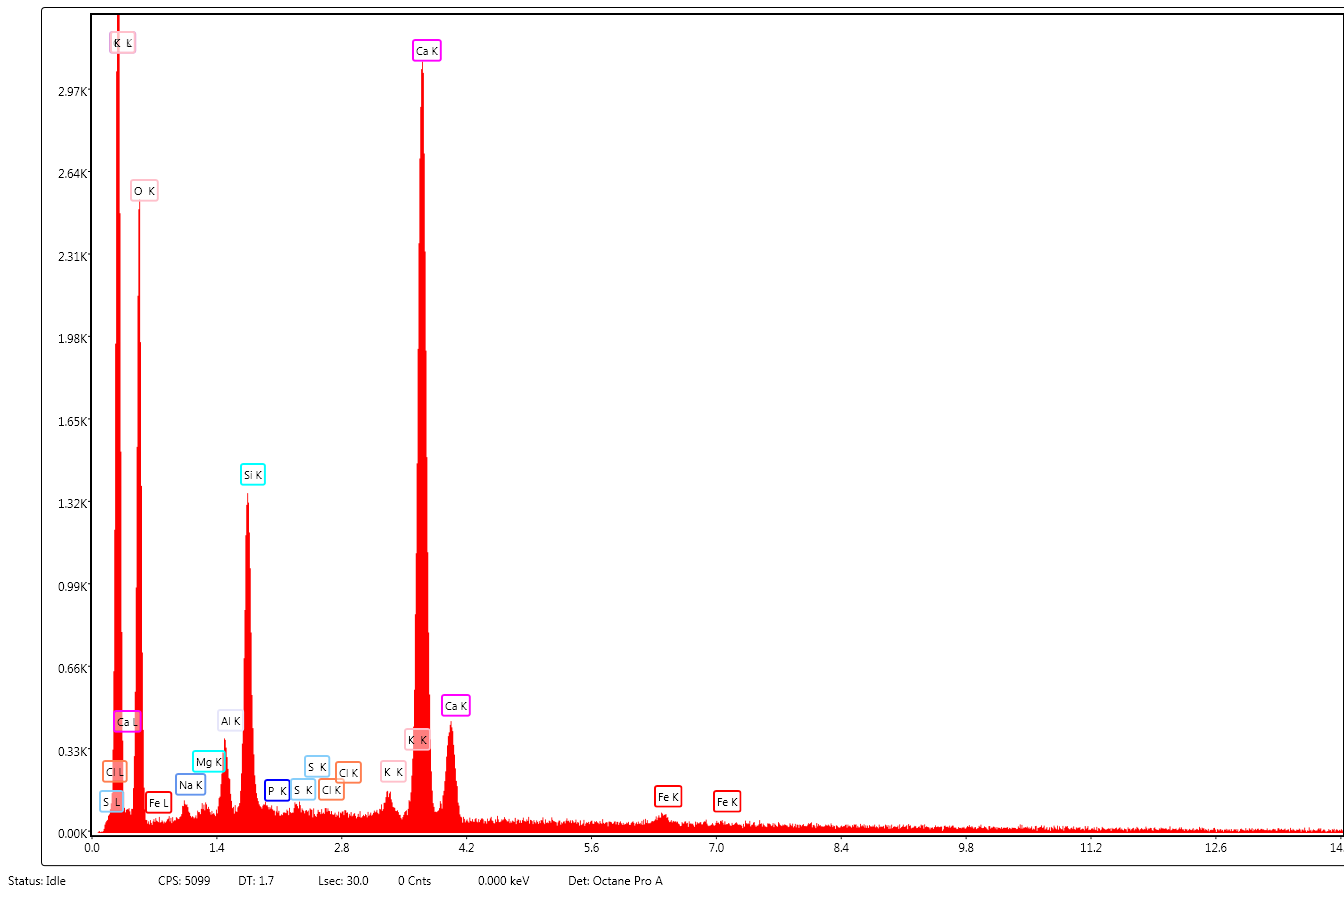** |
| --- |
| **Figure 3SA(2)** |

| 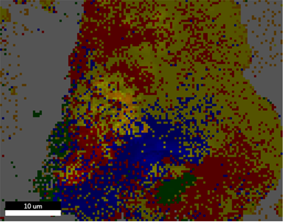 | 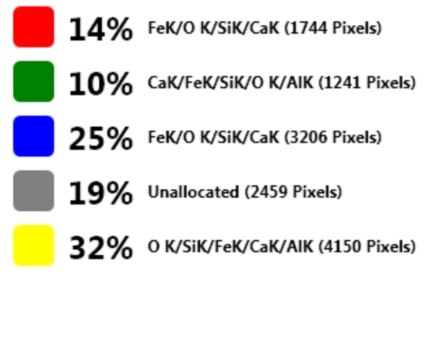 | 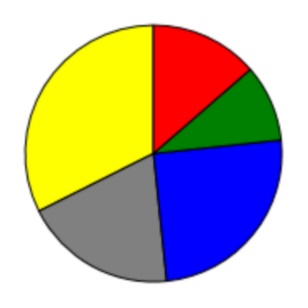 |
| --- | --- | --- |
| **Figure 3SB(1)** | | |

| 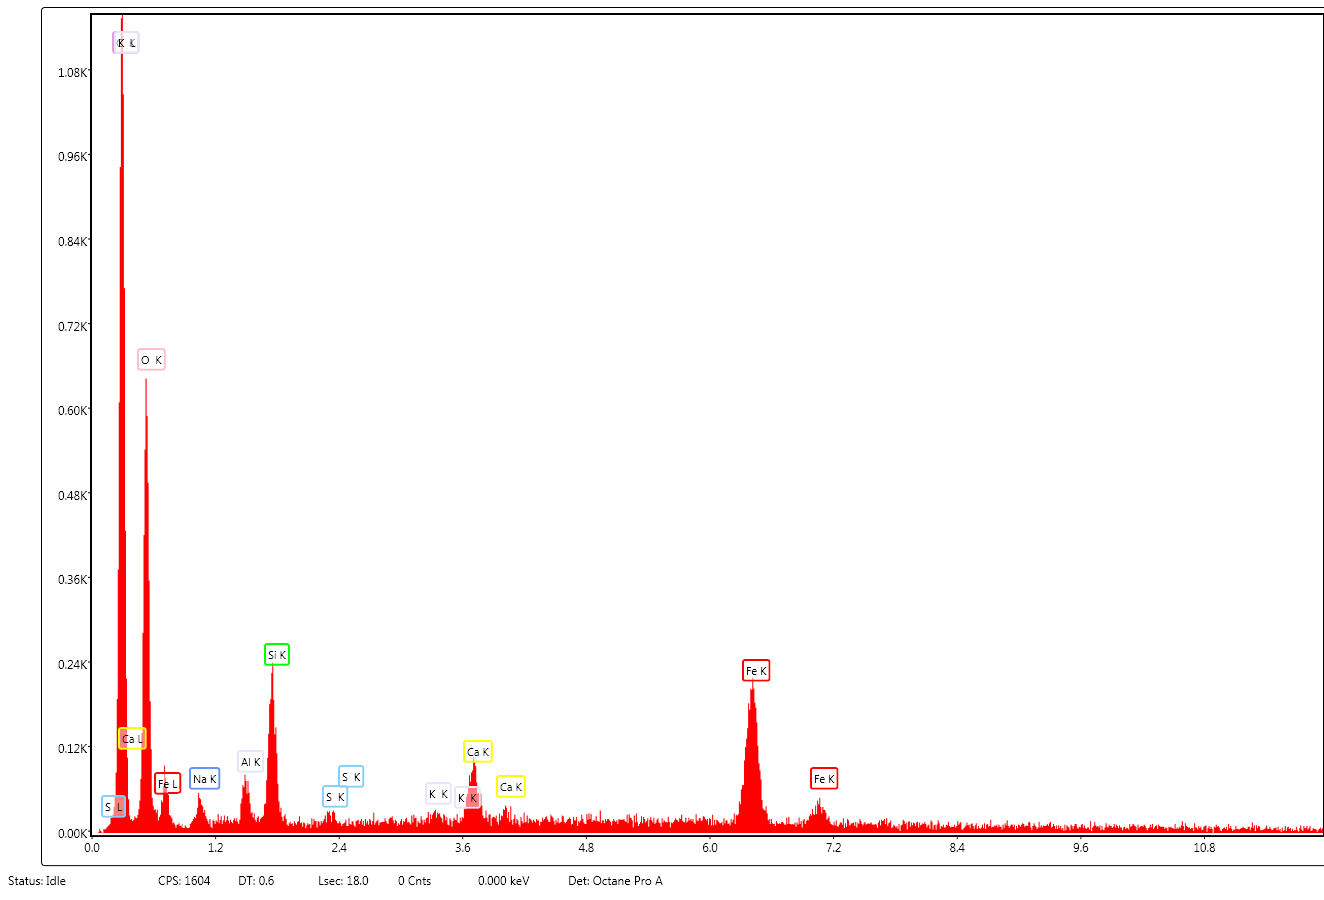 |
| --- |
| Figure 3SB(2) |

| **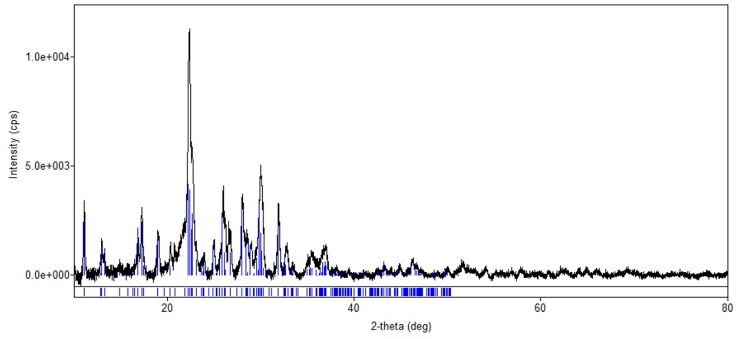** | **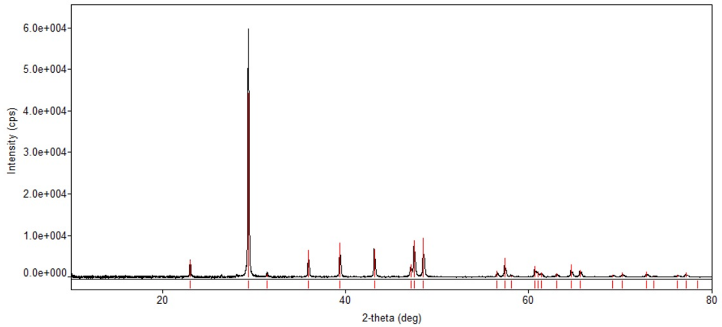** |
| --- | --- |

**A B**

| **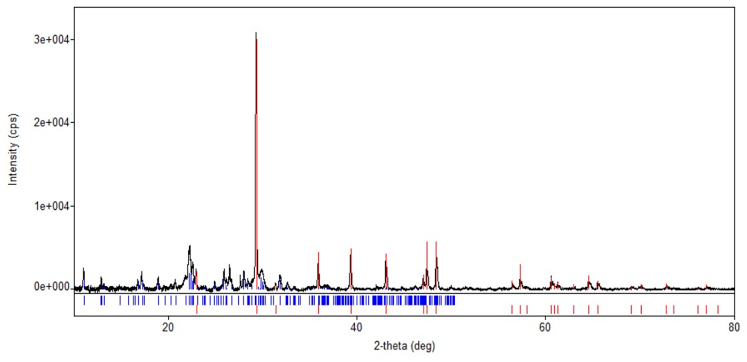** | **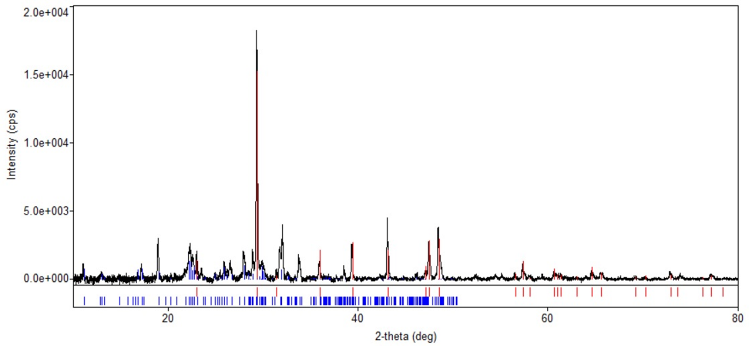** |
| --- | --- |

**C D**

**Figure 4S**

**
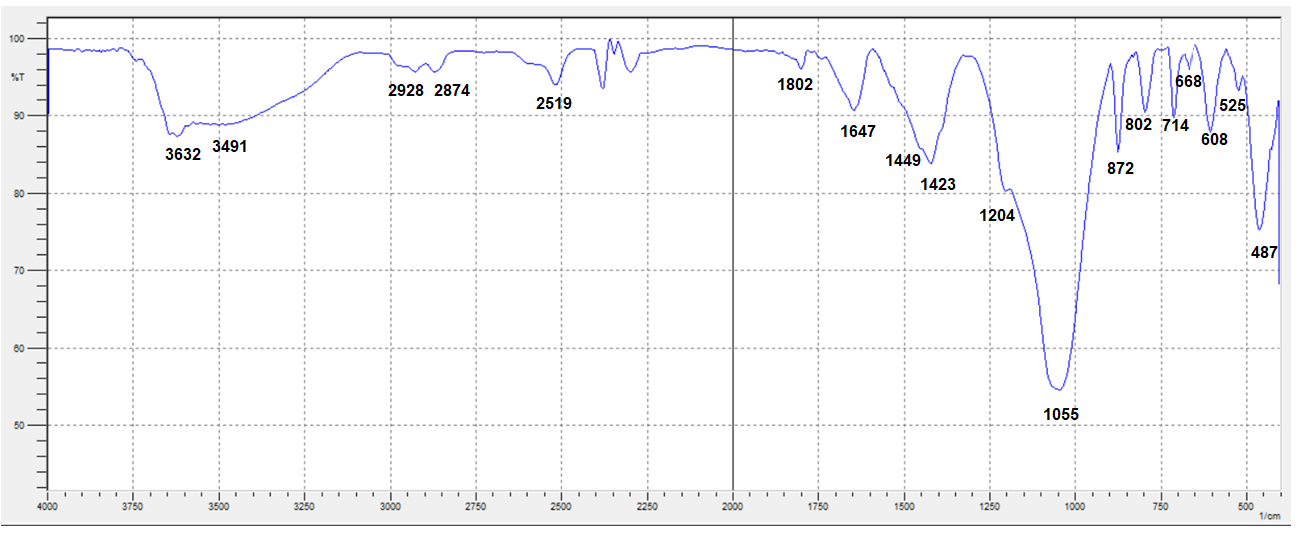
**

**Figure 5SA**

| **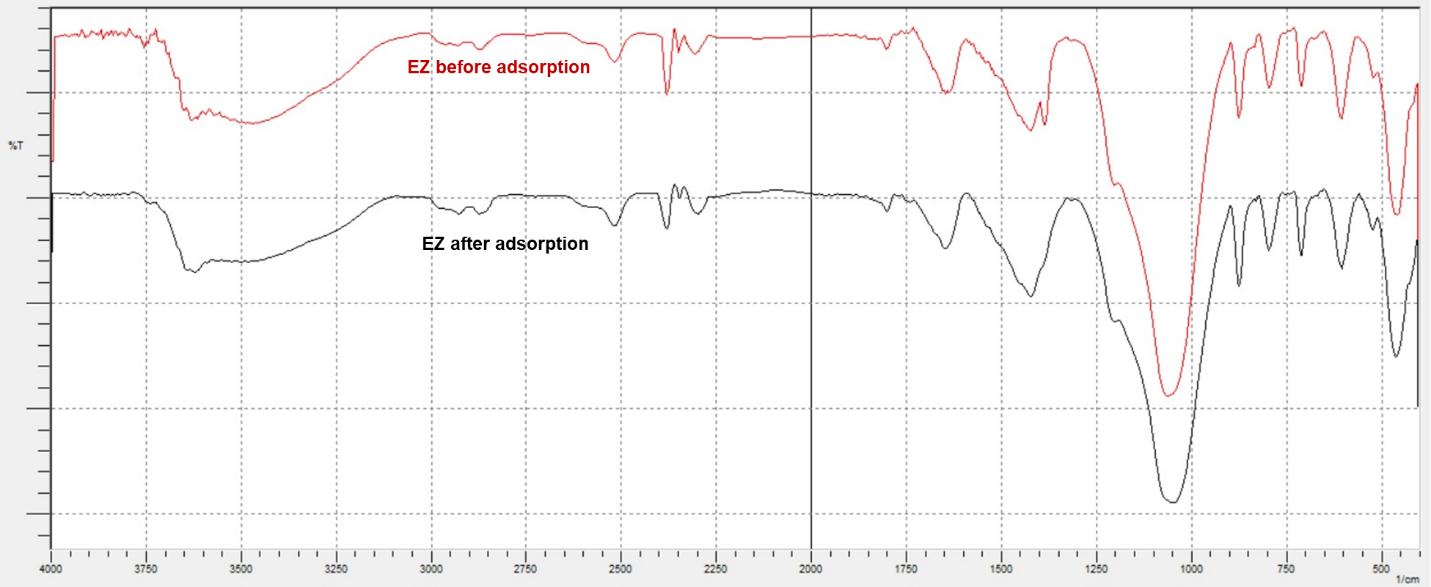** |
| --- |
| **Figure 5SB** |
|  |

| **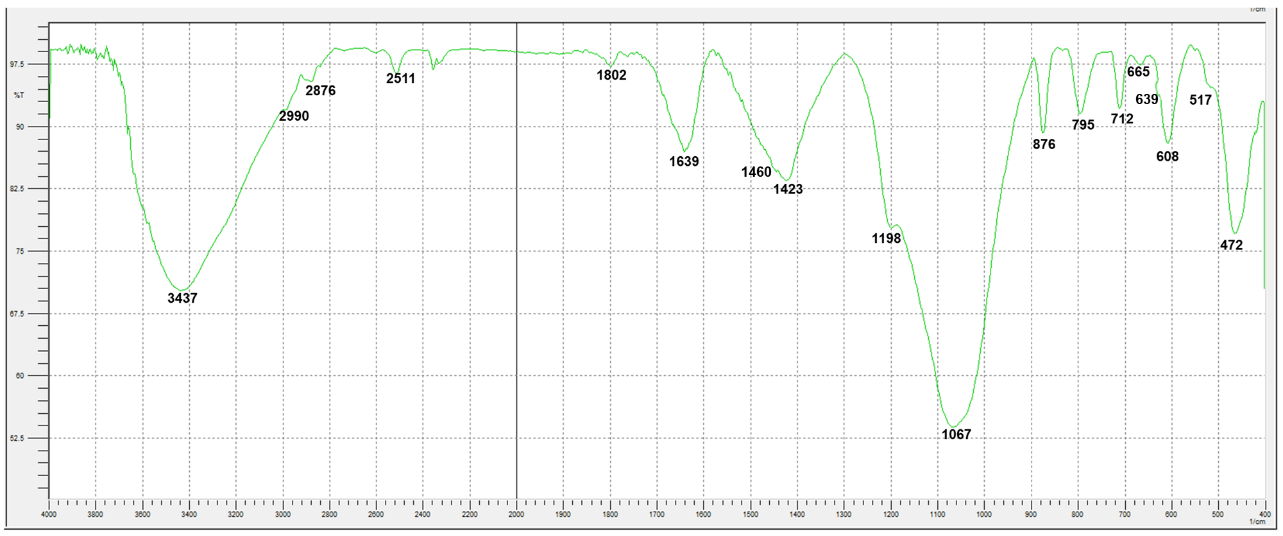** |
| --- |
| **Figure 6SA** |

| **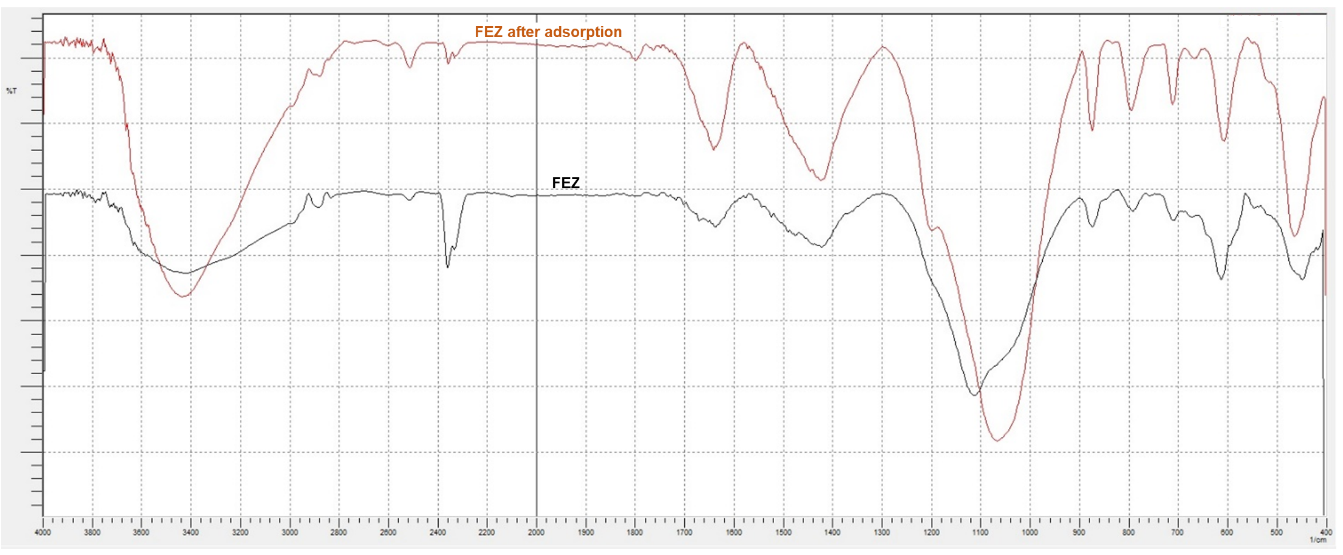** |
| --- |
| **Figure 6SB** |

| 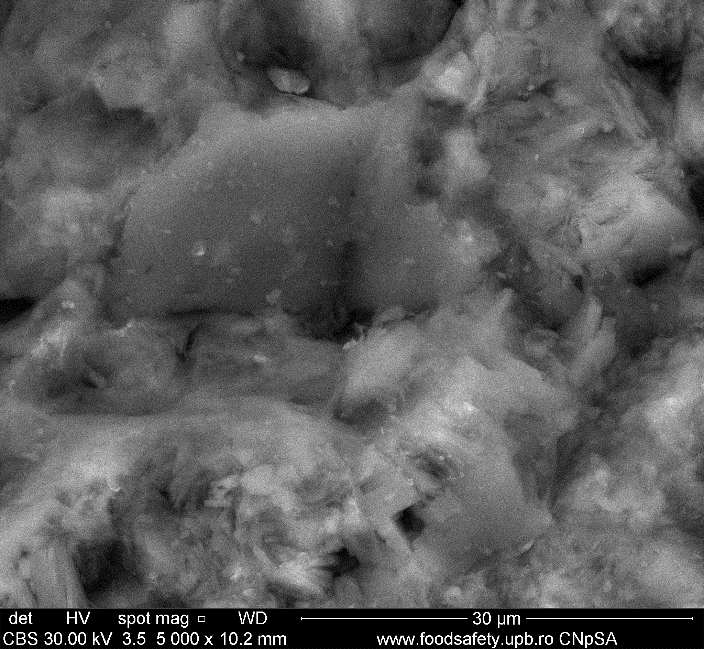 | 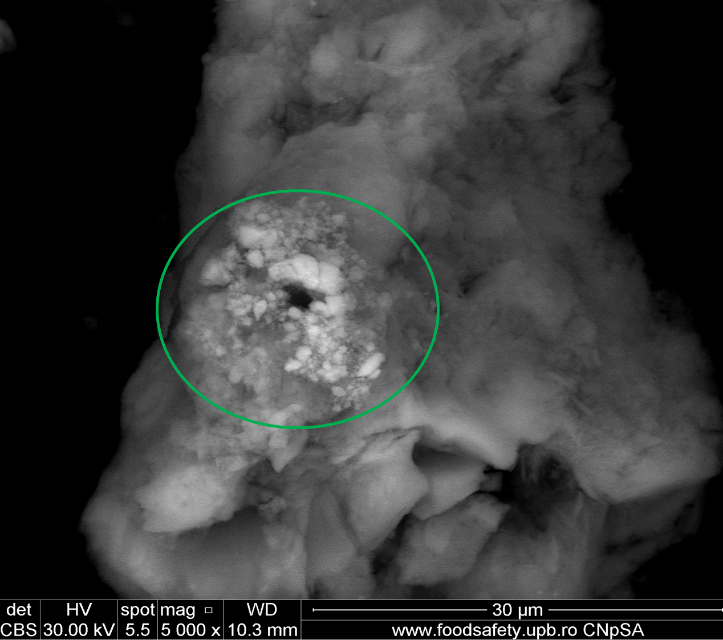 |
| --- | --- |
| **A** | **B** |

| **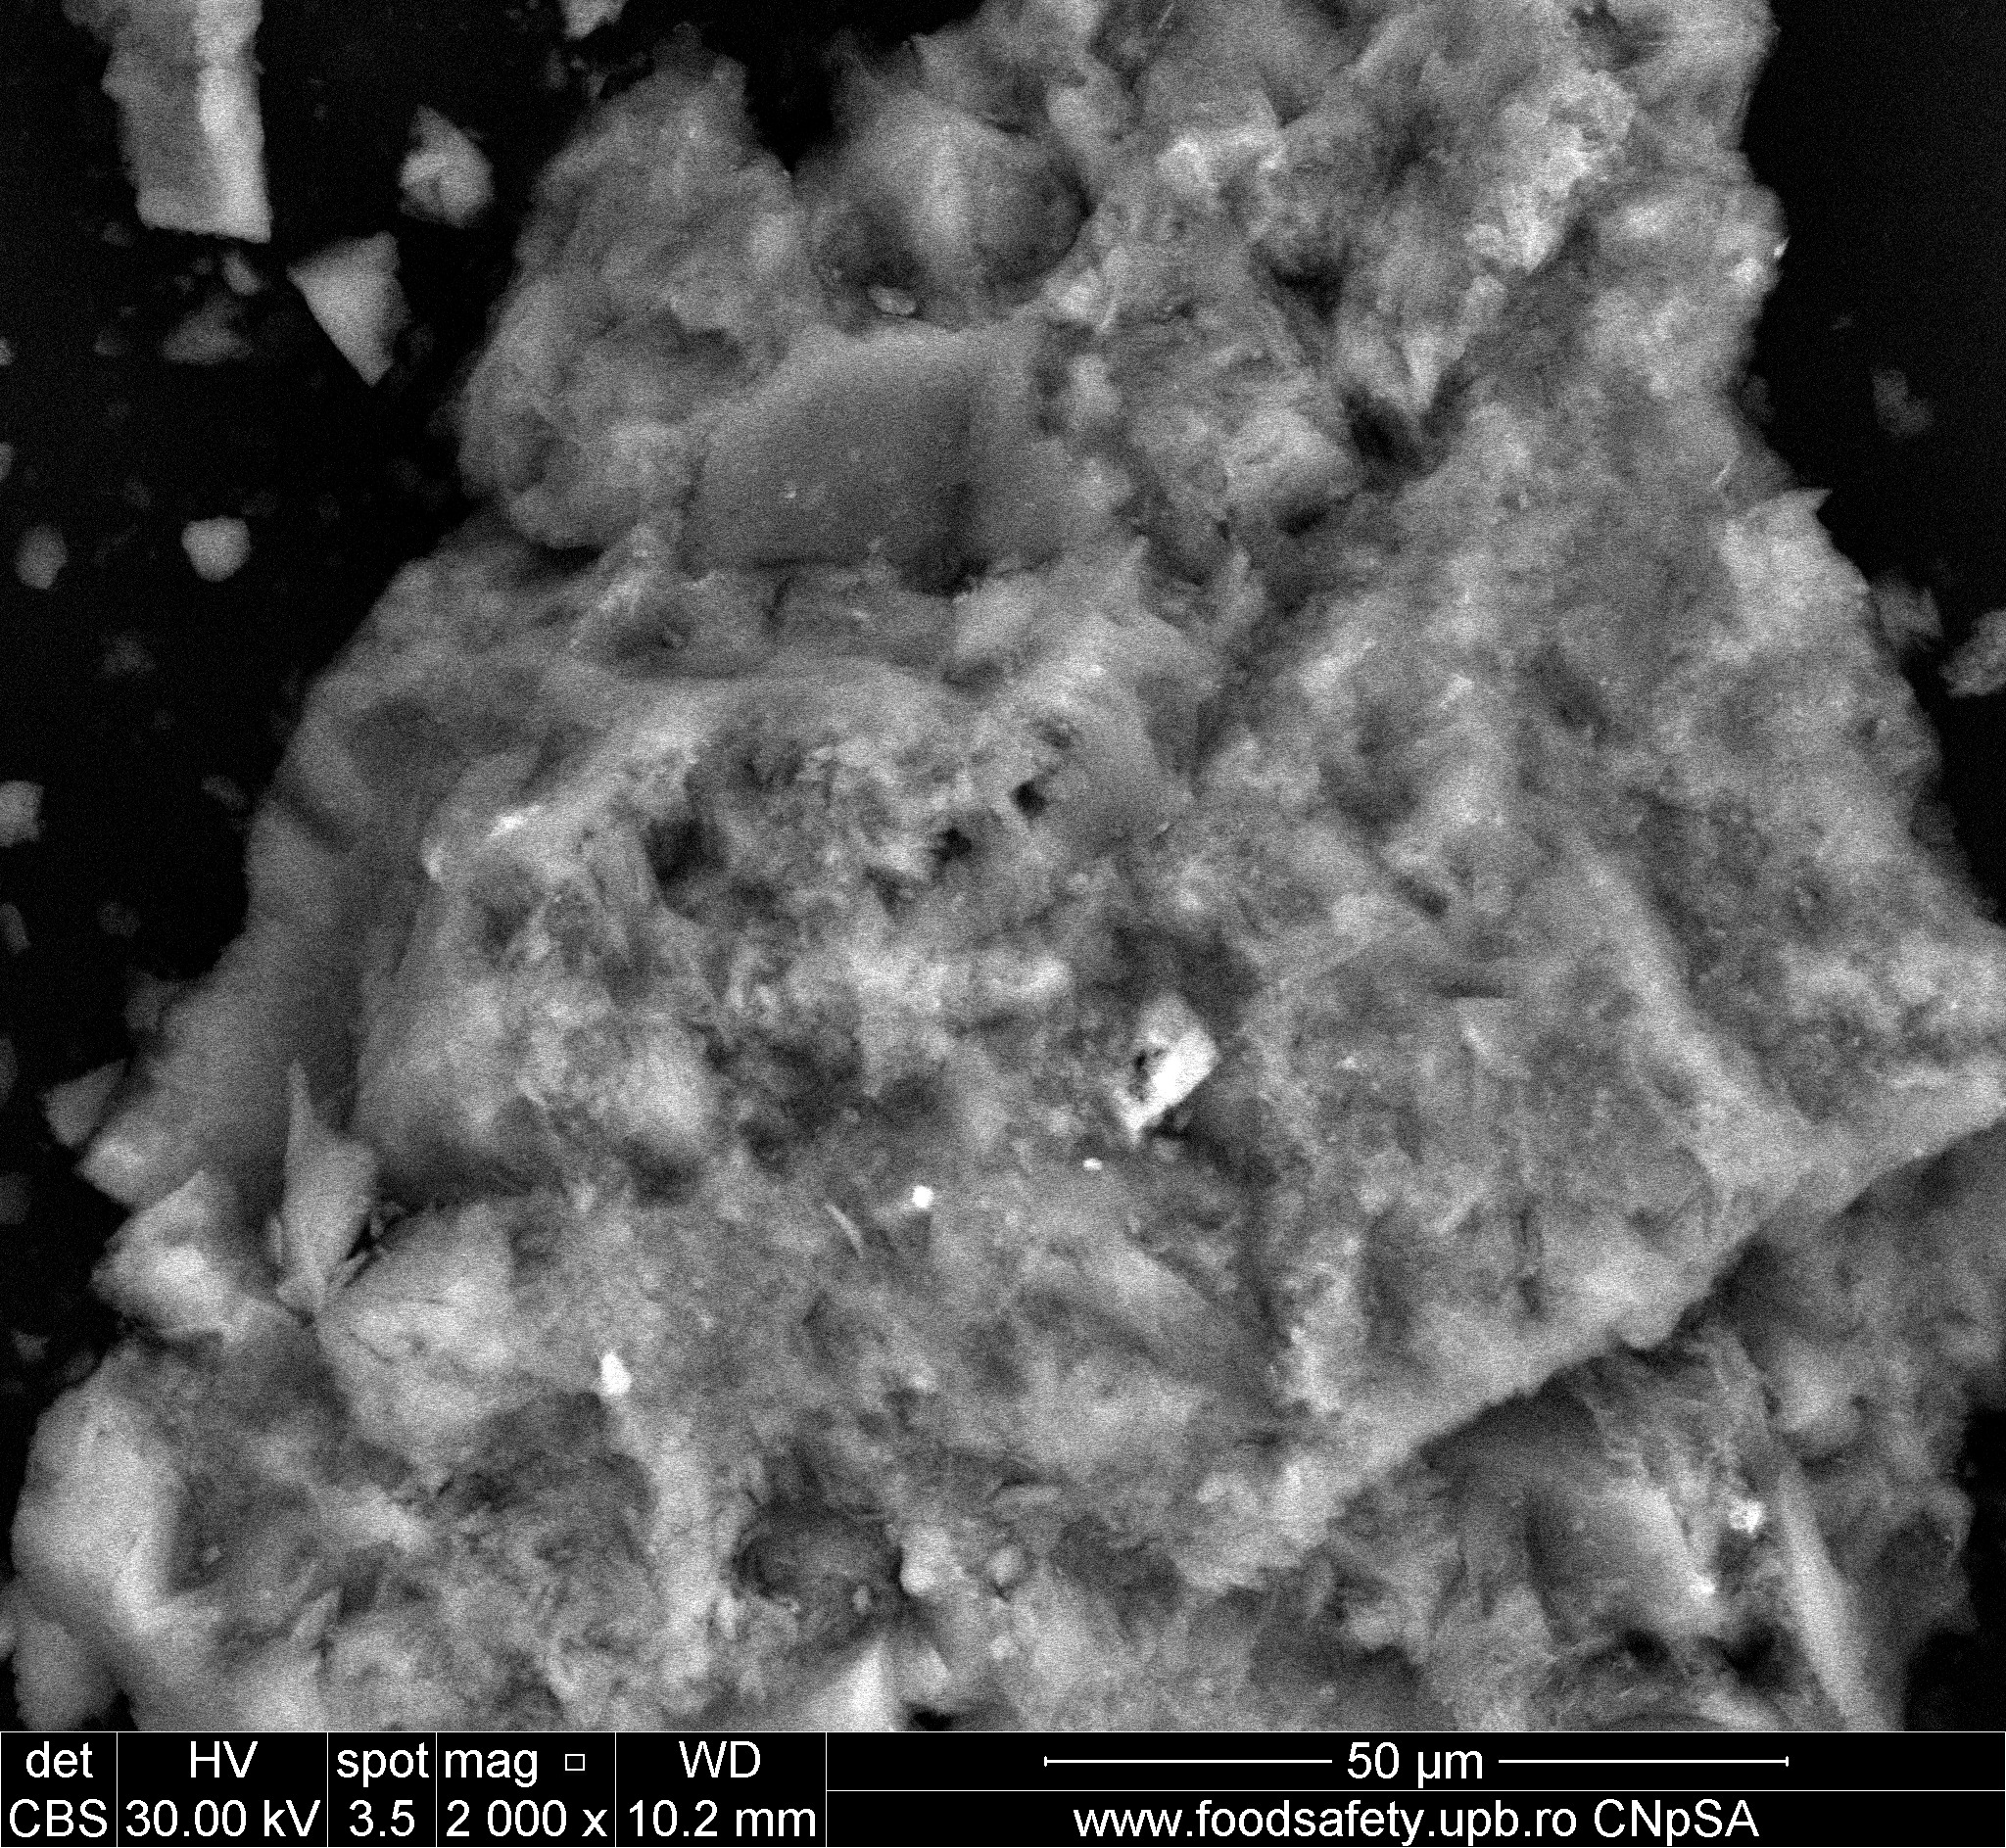** | **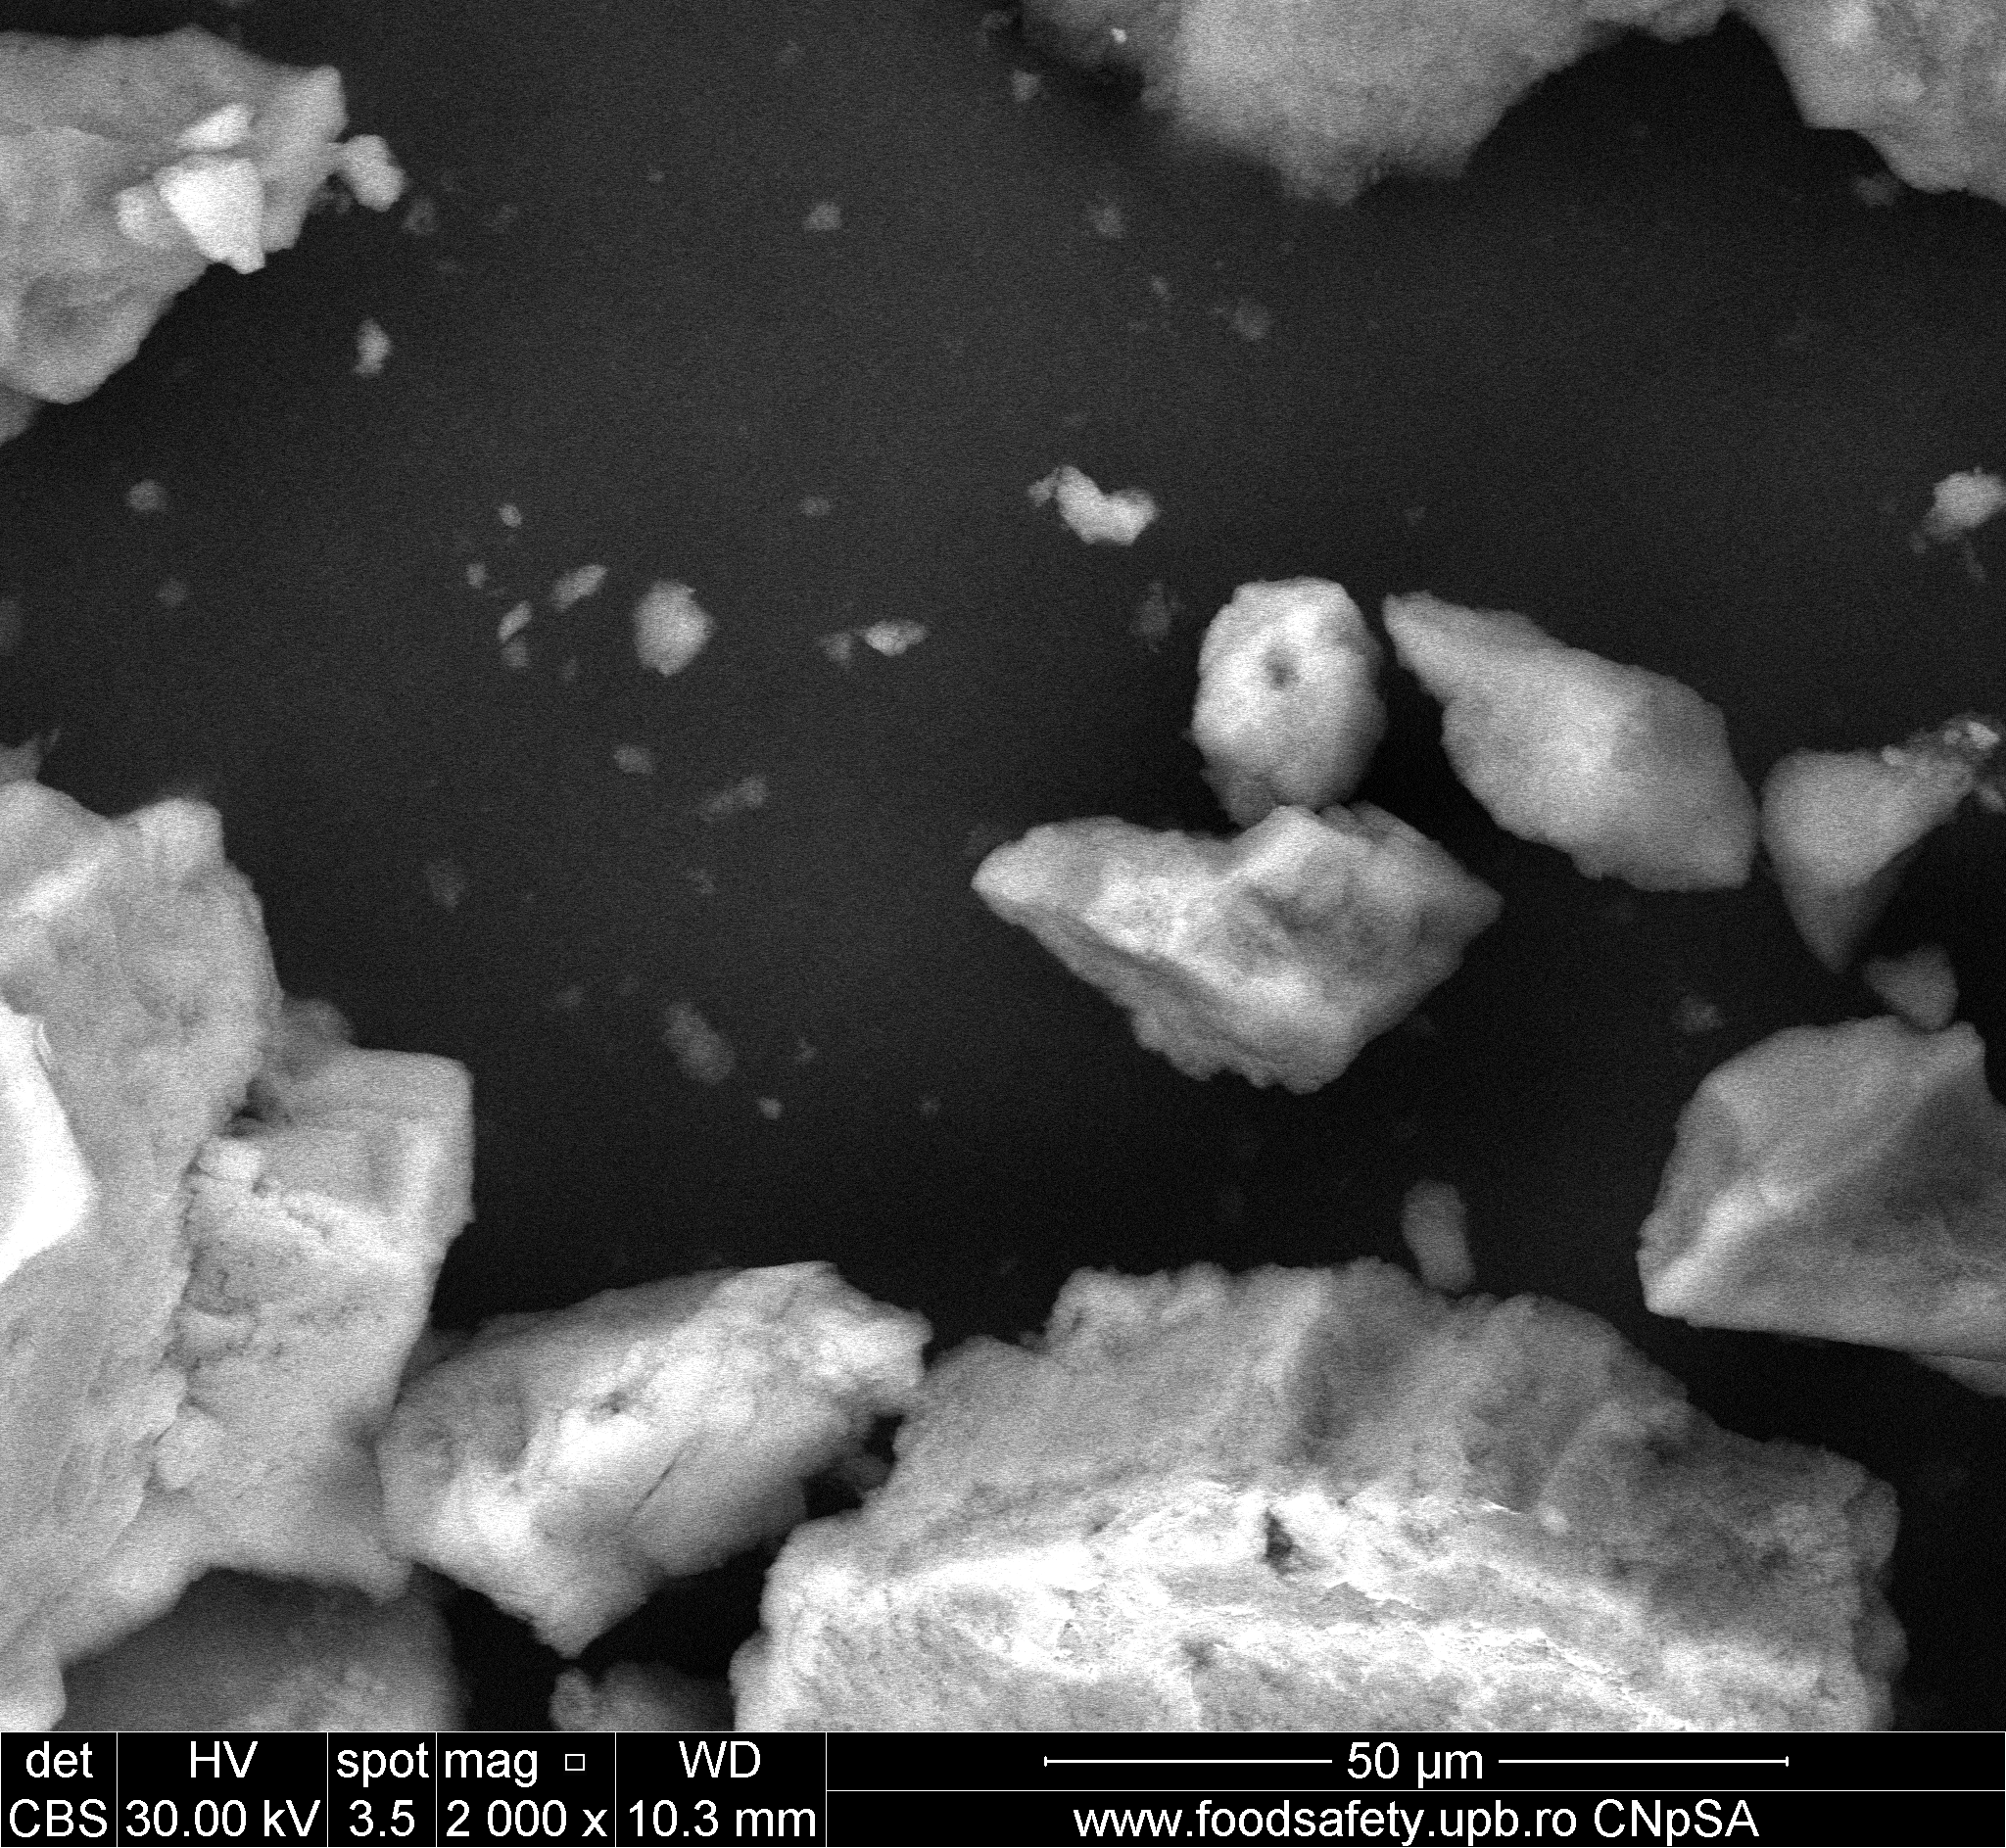** |
| --- | --- |
| **C** | **D** |

**Figure 7S**

| **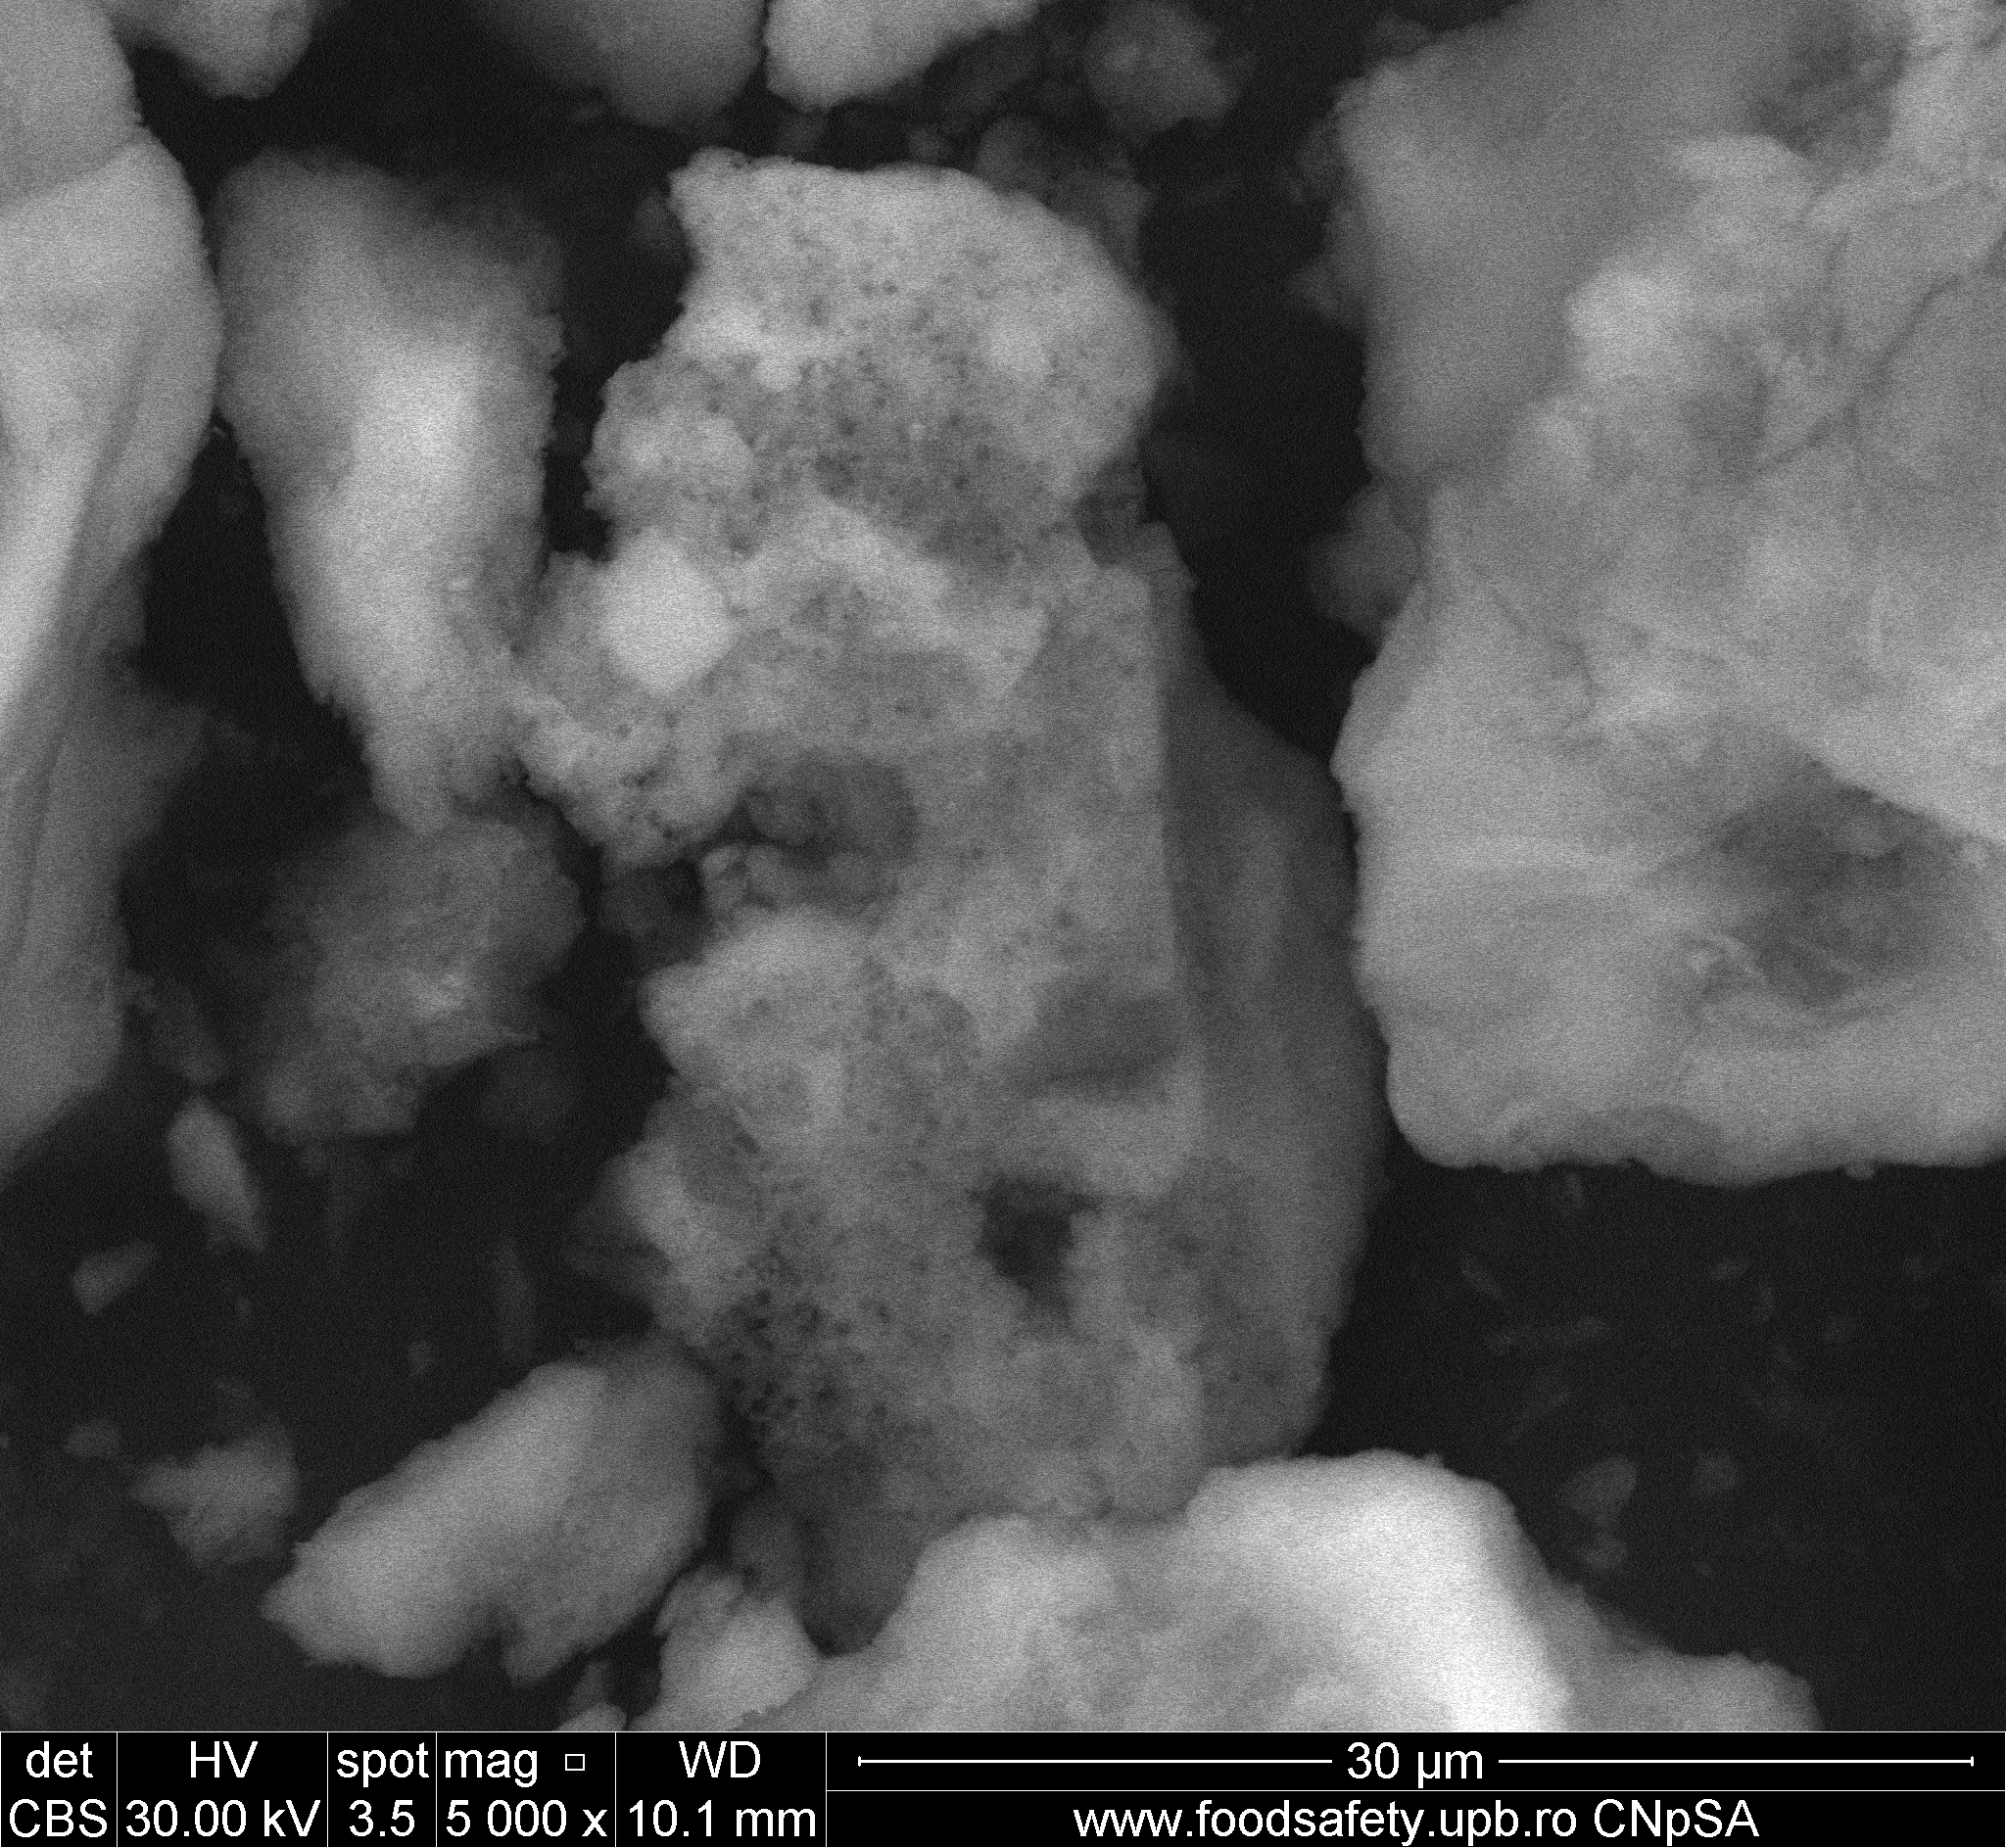** | 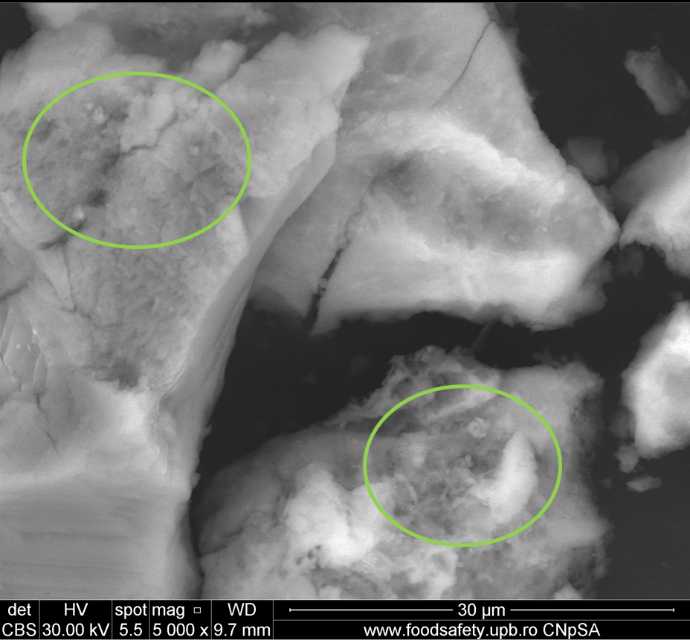 |
| --- | --- |
| **A** | **B** |

| 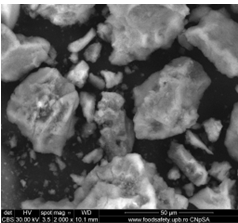 | 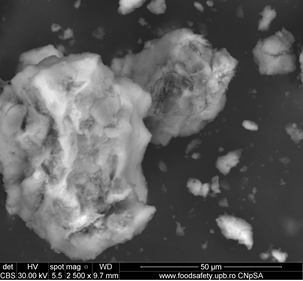 | **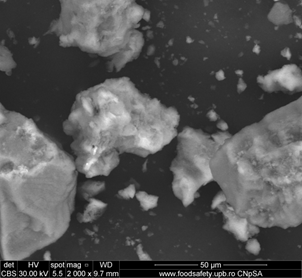** |
| --- | --- | --- |
| **C** | **D** | **E** |

**Figure 8S**

| 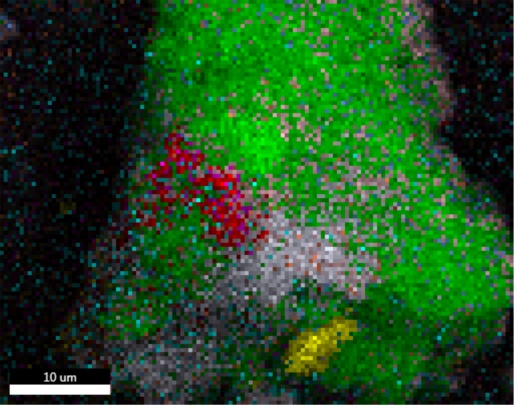 | **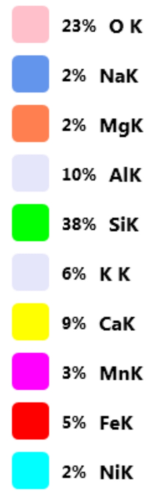** | 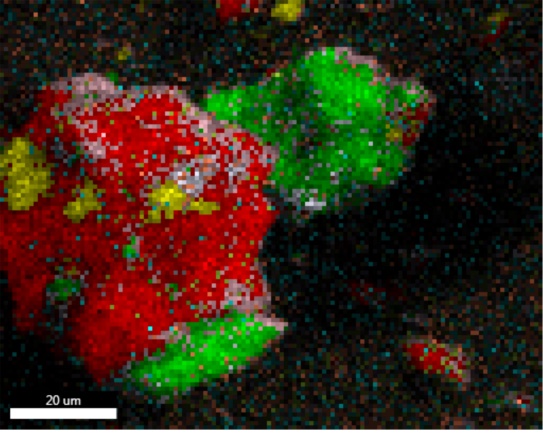 | **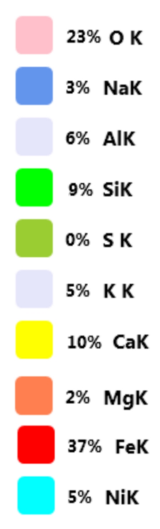** |
| --- | --- | --- | --- |
| **A** | | **B** | |

**Figure 9S**

|  | 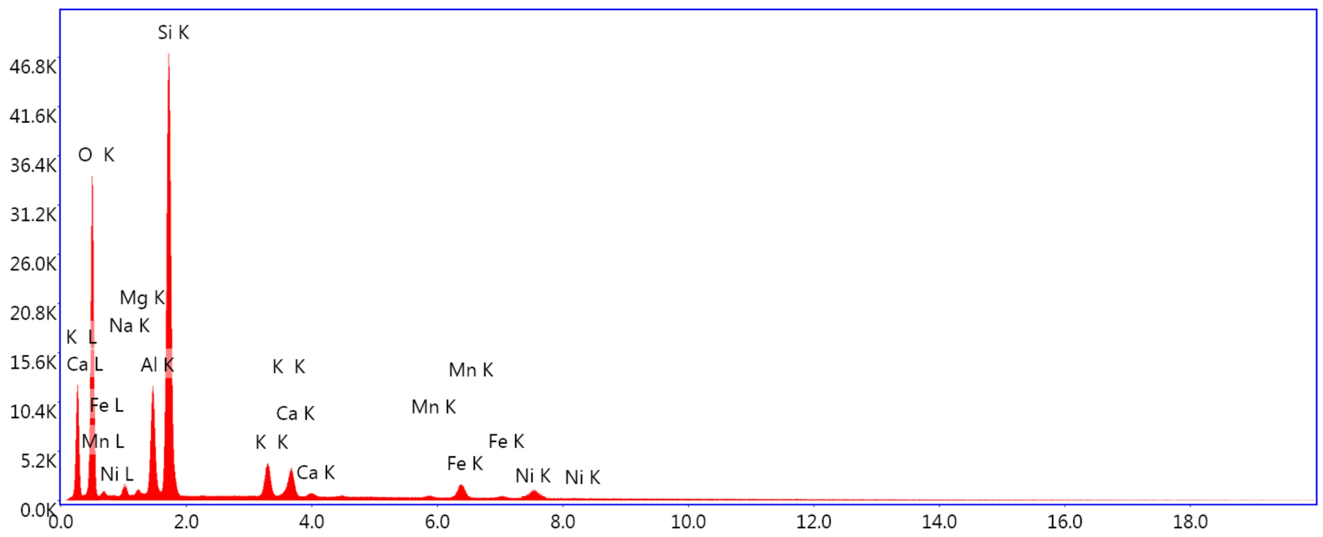 | | |
| --- | --- | --- | --- |
|  | | **Figure 10SA** | |
| 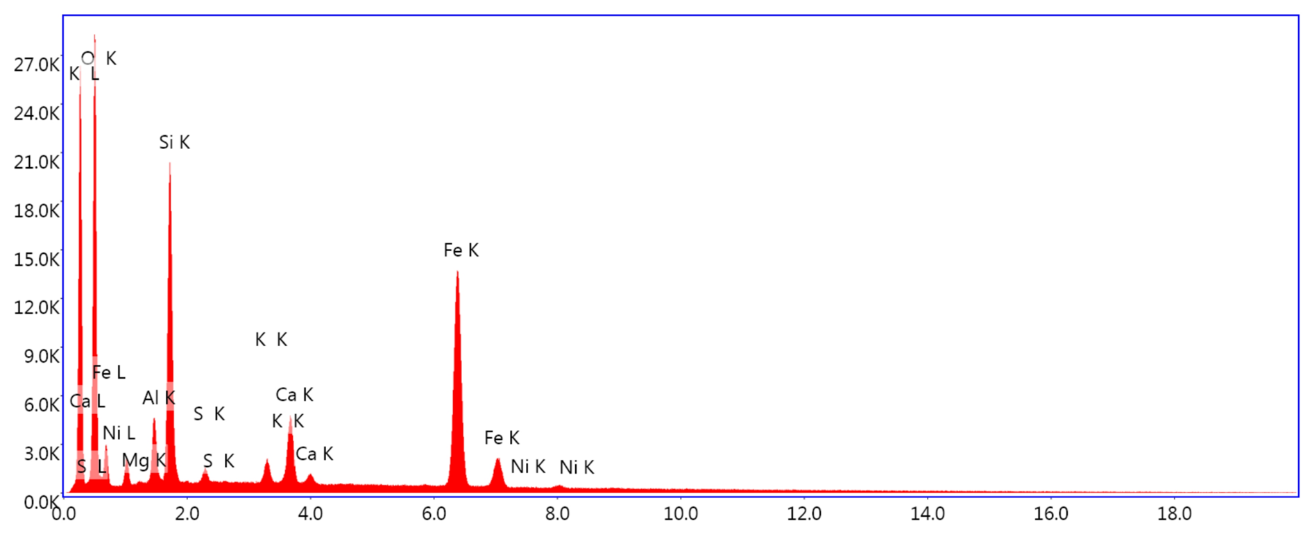 | | |  |
| **Figure 10SB** | | |  |
